# Supplementary material for: pT3 colorectal cancer revisited: a multicentric study on the histological depth of invasion in more than 1000 pT3 carcinomas—proposal for a new pT3a/pT3b subclassification
Source: PubMed Central journal article supplement (PMC9519960; doi:10.1038/s41416-022-01889-1), 2022-07-21
Supplement: 41416_2022_1889_MOESM1_ESM.pdf [file 41416_2022_1889_MOESM1_ESM.pdf]

# Supplementary Figure 1

**A - All cohorts, pT3 only, Colon (n=915, p<0.001)**

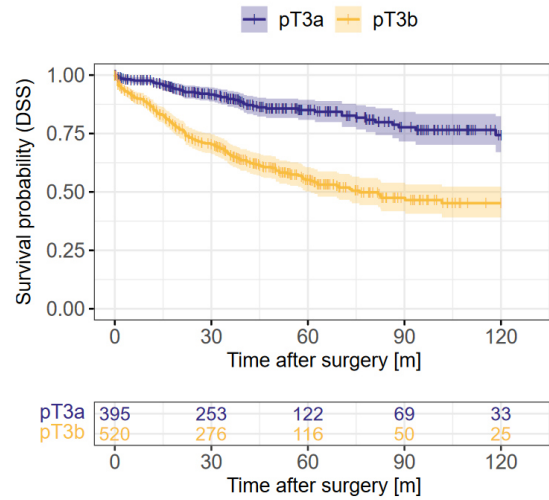

**B - All cohorts, pT3 only, Rectum (n=121, p<0.001)**

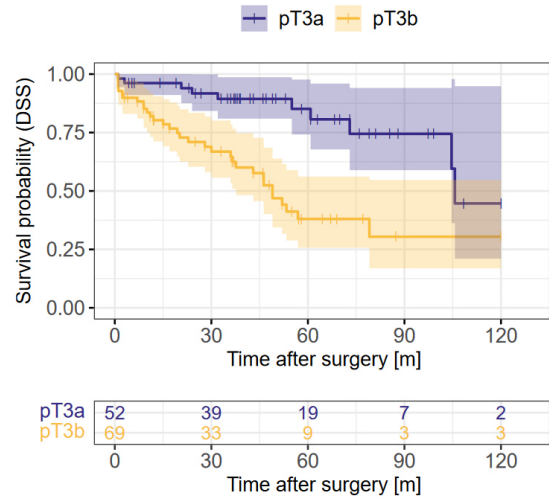

**C - All cohorts, Colon (n=1697, p<0.001)**

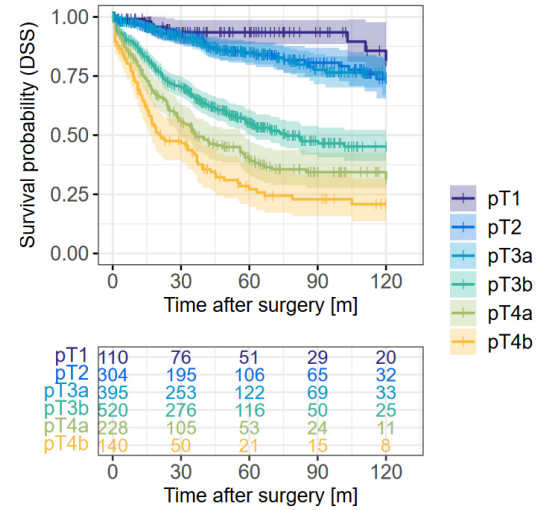

**D - All cohorts, Rectum (n=242, p<0.001)**

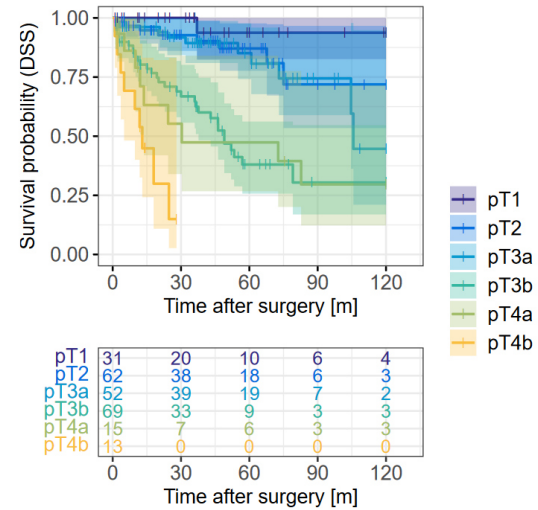

| Supplementary Table 1 |              | Overall n (%) | Mean overall survival (SE) [months] | <i>p</i> -value  | Mean disease specific survival (SE) [months] | <i>p</i> -value  | Mean disease free survival (SE) [months] | <i>p</i> -value  |
|-----------------------|--------------|---------------|-------------------------------------|------------------|----------------------------------------------|------------------|------------------------------------------|------------------|
| Age                   | below median | 471 (49.5%)   | 85.87 (2.2)                         | <b>&lt;0.001</b> | 90.60 (2.2)                                  | <b>0.04</b>      | 80.89 (2.4)                              | <b>0.76</b>      |
|                       | above median | 479 (50.5%)   | 72.29 (2.3)                         |                  | 84.06 (2.4)                                  |                  | 83.50 (2.5)                              |                  |
| Sex                   | male         | 543 (57.2%)   | 77.79 (2.1)                         | <b>0.32</b>      | 88.04 (2.1)                                  | <b>0.69</b>      | 82.85 (2.3)                              | <b>0.44</b>      |
|                       | female       | 407 (42.8%)   | 81.05 (2.5)                         |                  | 86.58 (2.5)                                  |                  | 80.95 (2.8)                              |                  |
| pT                    | 1            | 79 (8.3%)     | 97.68 (4.8)                         | <b>&lt;0.001</b> | 115.54 (2.9)                                 | <b>&lt;0.001</b> | 111.58 (3.7)                             | <b>&lt;0.001</b> |
|                       | 2            | 187 (19.7%)   | 93.33 (3.2)                         |                  | 103.92 (2.8)                                 |                  | 99.92 (3.1)                              |                  |
|                       | 3            | 487 (51.3%)   | 80.13 (2.2)                         |                  | 88.23 (2.2)                                  |                  | 81.04 (2.4)                              |                  |
|                       | 4a           | 126 (13.3%)   | 61.58 (4.5)                         |                  | 63.72 (4.6)                                  |                  | 53.70 (4.8)                              |                  |
|                       | 4b           | 71 (7.5%)     | 46.66 (5.8)                         |                  | 53.65 (6.4)                                  |                  | 53.93 (7.0)                              |                  |
| pN                    | 0            | 529 (55.7%)   | 89.76 (2.0)                         | <b>&lt;0.001</b> | 101.78 (1.8)                                 | <b>&lt;0.001</b> | 100.42 (2.0)                             | <b>&lt;0.001</b> |
|                       | 1            | 264 (27.8%)   | 75.59 (3.1)                         |                  | 80.50 (3.1)                                  |                  | 71.97 (3.4)                              |                  |
|                       | 2            | 157 (16.5%)   | 49.57 (4.0)                         |                  | 52.45 (4.1)                                  |                  | 40.55 (4.0)                              |                  |
| pM                    | 0            | 809 (85.2%)   | 86.69 (1.7)                         | <b>&lt;0.001</b> | 96.38 (1.6)                                  | <b>&lt;0.001</b> | 91.63 (1.8)                              | <b>&lt;0.001</b> |
|                       | 1            | 141 (14.8%)   | 39.46 (3.5)                         |                  | 41.42 (3.7)                                  |                  | 33.63 (3.6)                              |                  |
| UICC Stage            | 1            | 212 (22.3%)   | 97.09 (2.9)                         | <b>&lt;0.001</b> | 111.65 (2.0)                                 | <b>&lt;0.001</b> | 110.02 (2.4)                             | <b>&lt;0.001</b> |
|                       | 2            | 300 (31.6%)   | 86.61 (2.8)                         |                  | 97.15 (2.6)                                  |                  | 94.74 (2.8)                              |                  |
|                       | 3            | 293 (30.8%)   | 80.01 (2.9)                         |                  | 85.82 (2.9)                                  |                  | 74.24 (3.2)                              |                  |
|                       | 4            | 145 (15.3%)   | 38.71 (3.4)                         |                  | 40.65 (3.6)                                  |                  | 32.79 (3.6)                              |                  |
| WHO grade             | low-grade    | 645 (67.9%)   | 86.11 (1.9)                         | <b>&lt;0.001</b> | 94.84 (1.8)                                  | <b>&lt;0.001</b> | 90.06 (2.0)                              | <b>&lt;0.001</b> |
|                       | high-grade   | 305 (32.1%)   | 65.01 (2.9)                         |                  | 72.22 (3.0)                                  |                  | 66.53 (3.2)                              |                  |
| Resection margin      | R0           | 883 (92.9%)   | 82.83 (1.6)                         | <b>&lt;0.001</b> | 91.83 (1.6)                                  | <b>&lt;0.001</b> | 87.07 (1.8)                              | <b>&lt;0.001</b> |
|                       | R1           | 40 (4.2%)     | 41.82 (7.5)                         |                  | 43.37 (7.8)                                  |                  | 31.44 (6.9)                              |                  |
|                       | R2           | 27 (2.8%)     | 22.13 (3.3)                         |                  | 22.13 (3.3)                                  |                  | 21.87 (4.0)                              |                  |
| Tumour localisation   | Coecum       | 137 (14.4%)   | 76.59 (4.3)                         | <b>0.55</b>      | 86.69 (4.3)                                  | <b>0.61</b>      | 83.61 (4.5)                              | <b>0.83</b>      |
|                       | Ascendens    | 240 (25.3%)   | 79.00 (3.3)                         |                  | 88.04 (3.3)                                  |                  | 80.01 (3.5)                              |                  |
|                       | Transversum  | 75 (7.9%)     | 74.14 (6.1)                         |                  | 85.09 (6.1)                                  |                  | 84.33 (6.3)                              |                  |
|                       | Descendens   | 89 (9.4%)     | 74.75 (4.3)                         |                  | 80.65 (5.3)                                  |                  | 78.09 (5.6)                              |                  |
|                       | Sigmoid      | 305 (32.1%)   | 83.89 (2.8)                         |                  | 90.73 (2.8)                                  |                  | 84.00 (3.0)                              |                  |
|                       | Rectum       | 104 (10.9%)   | 76.97 (4.8)                         |                  | 85.14 (4.8)                                  |                  | 78.05 (5.4)                              |                  |

| Supplementary Table 2 |              | Overall n (%) | Mean overall survival (SE) [months] | <i>p</i> -value  | Mean disease specific survival (SE) [months] | <i>p</i> -value  | Mean disease free survival (SE) [months] | <i>p</i> -value  |
|-----------------------|--------------|---------------|-------------------------------------|------------------|----------------------------------------------|------------------|------------------------------------------|------------------|
| Age                   | below median | 263 (48.5%)   | 100.51 (5.2)                        | <b>0.001</b>     | 102.82 (5.1)                                 | <b>0.01</b>      | 84.91 (4.5)                              | <b>0.10</b>      |
|                       | above median | 279 (51.2%)   | 80.05 (4.1)                         |                  | 84.46 (3.8)                                  |                  | 75.07 (4.5)                              |                  |
| Sex                   | male         | 289 (53.3%)   | 88.84 (5.4)                         | <b>0.31</b>      | 94.47 (5.5)                                  | <b>0.68</b>      | 77.71 (4.4)                              | <b>0.43</b>      |
|                       | female       | 253 (46.7%)   | 89.01 (4.0)                         |                  | 89.72 (4.0)                                  |                  | 79.51 (5.8)                              |                  |
| pT                    | 1            | 52 (9.6%)     | 107.79 (9.1)                        | <b>&lt;0.001</b> | 117.04 (6.9)                                 | <b>&lt;0.001</b> | 107.45 (5.1)                             | <b>&lt;0.001</b> |
|                       | 2            | 121 (22.3%)   | 90.02 (6.1)                         |                  | 95.91 (5.9)                                  |                  | 86.62 (6.8)                              |                  |
|                       | 3            | 309 (57.0%)   | 74.41 (2.5)                         |                  | 74.92 (2.5)                                  |                  | 73.98 (6.2)                              |                  |
|                       | 4a           | 43 (7.9%)     | 58.25 (7.9)                         |                  | 59.91 (8.0)                                  |                  | 50.76 (7.7)                              |                  |
|                       | 4b           | 17 (3.1%)     | 32.67 (6.2)                         |                  | 34.67 (6.3)                                  |                  | 16.15 (3.4)                              |                  |
| pN                    | 0            | 328 (60.5%)   | 103.73 (4.7)                        | <b>&lt;0.001</b> | 109.66 (4.4)                                 | <b>&lt;0.001</b> | 96.62 (3.6)                              | <b>&lt;0.001</b> |
|                       | 1            | 136 (25.1%)   | 87.27 (5.4)                         |                  | 87.95 (5.4)                                  |                  | 74.31 (5.8)                              |                  |
|                       | 2            | 78 (14.4%)    | 38.56 (4.7)                         |                  | 39.18 (4.7)                                  |                  | 29.56 (3.5)                              |                  |
| pM                    | 0            | 485 (89.5%)   | 97.41 (4.4)                         | <b>&lt;0.001</b> | 101.42 (4.4)                                 | <b>&lt;0.001</b> | 85.17 (3.7)                              | <b>&lt;0.001</b> |
|                       | 1            | 57 (10.5%)    | 39.64 (5.6)                         |                  | 40.68 (5.7)                                  |                  | 24.96 (3.3)                              |                  |
| UICC Stage            | 1            | 135 (24.9%)   | 107.66 (7.6)                        | <b>&lt;0.001</b> | 122.63 (3.6)                                 | <b>&lt;0.001</b> | 109.74 (3.4)                             | <b>&lt;0.001</b> |
|                       | 2            | 182 (33.6%)   | 77.69 (2.9)                         |                  | 78.54 (2.9)                                  |                  | 74.46 (3.0)                              |                  |
|                       | 3            | 168 (31.0%)   | 79.75 (5.2)                         |                  | 80.26 (5.2)                                  |                  | 66.66 (5.1)                              |                  |
|                       | 4            | 57 (10.5%)    | 39.64 (5.6)                         |                  | 40.68 (5.7)                                  |                  | 24.96 (3.3)                              |                  |
| WHO grade             | low-grade    | 388 (71.6%)   | 100.54 (4.3)                        | <b>0.02</b>      | 106.03 (4.1)                                 | <b>0.002</b>     | 81.38 (4.7)                              | <b>0.10</b>      |
|                       | high-grade   | 154 (28.4%)   | 77.31 (5.2)                         |                  | 77.31 (5.2)                                  |                  | 73.09 (5.2)                              |                  |
| Resection margin      | R0           | 523 (96.5%)   | 93.28 (4.5)                         | <b>0.01</b>      | 97.05 (4.5)                                  | <b>0.001</b>     | 79.83 (3.7)                              | <b>&lt;0.001</b> |
|                       | R1           | 17 (3.1%)     | 61.63 (14.2)                        |                  | 61.63 (14.2)                                 |                  | 52.86 (14.4)                             |                  |
|                       | R2           | 2 (0.4)       | 20.00 (3.5)                         |                  | 20.00 (3.5)                                  |                  | 19.50 (4.5)                              |                  |
| Tumour localisation   | Coecum       | 75 (13.8%)    | 59.05 (3.7)                         | <b>0.20</b>      | 62.68 (3.4)                                  | <b>0.33</b>      | 53.38 (3.4)                              | <b>0.28</b>      |
|                       | Ascendens    | 148 (27.3%)   | 87.70 (5.0)                         |                  | 93.21 (4.0)                                  |                  | 83.65 (4.4)                              |                  |
|                       | Transversum  | 48 (8.9%)     | 83.27 (8.6)                         |                  | 83.27 (8.6)                                  |                  | 71.15 (8.1)                              |                  |
|                       | Descendens   | 74 (13.7%)    | 108.88 (6.6)                        |                  | 108.88 (6.6)                                 |                  | 86.61 (7.5)                              |                  |
|                       | Sigma        | 92 (17.0%)    | 61.01 (4.9)                         |                  | 63.97 (4.9)                                  |                  | 55.53 (4.4)                              |                  |
|                       | Rectum       | 105 (19.4%)   | 86.65 (7.7)                         |                  | 87.55 (7.8)                                  |                  | 80.77 (7.4)                              |                  |

| Supplementary Table 3 |              | Overall n (%) | Mean overall survival (SE) |                  | Mean disease specific survival (SE) |                  | Mean disease free survival (SE) |                  |
|-----------------------|--------------|---------------|----------------------------|------------------|-------------------------------------|------------------|---------------------------------|------------------|
|                       |              |               | [months]                   | <i>p</i> -value  | [months]                            | <i>p</i> -value  | [months]                        | <i>p</i> -value  |
| Age                   | below median | 221 (49.4%)   | 49.05 (3.2)                | <b>0.001</b>     | 57.71 (3.9)                         | <b>0.33</b>      | 53.35 (3.8)                     | <b>0.51</b>      |
|                       | above median | 226 (50.6%)   | 34.92 (2.4)                |                  | 49.30 (3.4)                         |                  | 47.02 (3.3)                     |                  |
| Sex                   | male         | 239 (53.5%)   | 41.19 (2.8)                | <b>0.62</b>      | 54.55 (3.9)                         | <b>0.71</b>      | 49.49 (3.6)                     | <b>0.48</b>      |
|                       | female       | 208 (46.5%)   | 42.22 (2.7)                |                  | 52.28 (3.3)                         |                  | 50.63 (3.4)                     |                  |
| pT                    | 1            | 10 (2.2%)     | 47.12 (13.7)               | <b>&lt;0.001</b> | 88.20 (11.4)                        | <b>&lt;0.001</b> | 88.20 (11.4)                    | <b>&lt;0.001</b> |
|                       | 2            | 58 (13.0%)    | 56.89 (5.0)                |                  | 79.39 (5.0)                         |                  | 75.93 (5.3)                     |                  |
|                       | 3            | 240 (53.7%)   | 45.65 (3.0)                |                  | 58.22 (4.0)                         |                  | 55.77 (4.0)                     |                  |
|                       | 4a           | 74 (16.6%)    | 35.72 (4.5)                |                  | 38.25 (4.7)                         |                  | 33.42 (4.2)                     |                  |
|                       | 4b           | 65 (14.5%)    | 24.46 (3.9)                |                  | 28.06 (4.6)                         |                  | 28.93 (4.5)                     |                  |
| pN                    | 0            | 225 (50.3%)   | 48.45 (3.0)                | <b>0.001</b>     | 72.41 (4.3)                         | <b>&lt;0.001</b> | 68.81 (4.2)                     | <b>&lt;0.001</b> |
|                       | 1            | 113 (25.3%)   | 38.34 (3.5)                |                  | 44.70 (4.1)                         |                  | 41.63 (4.0)                     |                  |
|                       | 2            | 109 (24.4%)   | 32.86 (4.0)                |                  | 35.63 (4.5)                         |                  | 31.08 (4.1)                     |                  |
| pM                    | 0            | 340 (76.1%)   | 48.61 (2.5)                | <b>&lt;0.001</b> | 69.75 (3.5)                         | <b>&lt;0.001</b> | 67.24 (3.5)                     | <b>&lt;0.001</b> |
|                       | 1            | 107 (23.9%)   | 23.12 (2.6)                |                  | 24.13 (2.7)                         |                  | 21.09 (2.3)                     |                  |
| UICC Stage            | 1            | 54 (12.1%)    | 55.16 (5.2)                | <b>&lt;0.001</b> | 80.00 (5.1)                         | <b>&lt;0.001</b> | 78.12 (5.2)                     | <b>&lt;0.001</b> |
|                       | 2            | 156 (34.9%)   | 49.41 (3.9)                |                  | 69.68 (5.3)                         |                  | 66.72 (5.2)                     |                  |
|                       | 3            | 130 (29.1%)   | 46.77 (4.4)                |                  | 59.78 (5.4)                         |                  | 57.53 (5.5)                     |                  |
|                       | 4            | 107 (23.9%)   | 23.00 (2.5)                |                  | 23.99 (2.6)                         |                  | 20.96 (2.2)                     |                  |
| WHO grade             | low-grade    | 337 (75.4%)   | 44.24 (2.4)                | <b>0.02</b>      | 58.45 (3.4)                         | <b>0.03</b>      | 54.78 (3.2)                     | <b>0.02</b>      |
|                       | high-grade   | 110 (24.6%)   | 33.92 (3.4)                |                  | 41.68 (4.0)                         |                  | 38.94 (3.9)                     |                  |
| Resection margin      | R0           | 391 (87.5%)   | 45.29 (2.3)                | <b>&lt;0.001</b> | 61.97 (3.3)                         | <b>&lt;0.001</b> | 58.93 (3.3)                     | <b>&lt;0.001</b> |
|                       | R1           | 26 (5.8%)     | 17.56 (3.9)                |                  | 17.56 (3.9)                         |                  | 16.50 (3.5)                     |                  |
|                       | R2           | 30 (6.7%)     | 24.47 (4.4)                |                  | 25.40 (4.4)                         |                  | 25.63 (4.3)                     |                  |
| Tumour localisation   | Coecum       | 81 (18.1%)    | 40.98 (5.2)                | <b>0.02</b>      | 57.24 (6.2)                         | <b>0.18</b>      | 52.52 (6.2)                     | <b>0.04</b>      |
|                       | Ascendens    | 135 (30.2%)   | 49.74 (4.2)                |                  | 75.64 (4.7)                         |                  | 61.00 (5.2)                     |                  |
|                       | Transversum  | 81 (18.1%)    | 36.92 (3.9)                |                  | 65.89 (7.0)                         |                  | 46.41 (5.0)                     |                  |
|                       | Descendens   | 54 (12.1%)    | 41.58 (5.8)                |                  | 59.98 (9.8)                         |                  | 42.81 (6.7)                     |                  |
|                       | Sigmoid      | 63 (14.1%)    | 43.62 (5.7)                |                  | 61.88 (7.7)                         |                  | 50.42 (6.7)                     |                  |
|                       | Rectum       | 33 (7.4%)     | 26.19 (4.8)                |                  | 34.65 (9.3)                         |                  | 32.63 (6.5)                     |                  |

| Supplementary Table 4           |      | Overall n (%) | Mean overall survival (SE) | p-value          | Mean disease specific survival (SE) | p-value          | Mean disease free survival (SE) | p-value          |
|---------------------------------|------|---------------|----------------------------|------------------|-------------------------------------|------------------|---------------------------------|------------------|
|                                 |      |               | [months]                   |                  | [months]                            |                  | [months]                        |                  |
| All pT3 Tumors                  | pT3a | 198 (40.7%)   | 94.73 (3.0)                | <b>&lt;0.001</b> | 106.70 (2.5)                        | <b>&lt;0.001</b> | 100.08 (3.1)                    | <b>&lt;0.001</b> |
|                                 | pT3b | 289 (59.3%)   | 69.66 (3.0)                |                  | 75.22 (3.1)                         |                  | 67.39 (3.3)                     |                  |
| WHO grade: low-grade subcohort  | pT3a | 142 (43.4%)   | 95.49 (3.5)                | <b>0.003</b>     | 108.19 (2.8)                        | <b>&lt;0.001</b> | 101.32 (3.5)                    | <b>&lt;0.001</b> |
|                                 | pT3b | 185 (56.6%)   | 78.20 (3.7)                |                  | 83.99 (3.7)                         |                  | 75.59 (4.1)                     |                  |
| WHO grade: high-grade subcohort | pT3a | 56 (35.0%)    | 92.60 (5.8)                | <b>&lt;0.001</b> | 102.89 (5.0)                        | <b>&lt;0.001</b> | 97.02 (6.1)                     | <b>&lt;0.001</b> |
|                                 | pT3b | 104 (65.0%)   | 54.46 (4.9)                |                  | 59.39 (5.2)                         |                  | 52.88 (5.3)                     |                  |
| pN0 subcohort                   | pT3a | 132 (54.3%)   | 97.79 (3.4)                | <b>&lt;0.001</b> | 109.27 (2.7)                        | <b>&lt;0.001</b> | 105.13 (3.3)                    | <b>0.008</b>     |
|                                 | pT3b | 111 (45.7%)   | 76.07 (4.8)                |                  | 86.60 (4.9)                         |                  | 88.97 (5.0)                     |                  |
| pN1/2 subcohort                 | pT3a | 66 (27.0%)    | 88.82 (5.8)                | <b>0.003</b>     | 101.47 (5.1)                        | <b>&lt;0.001</b> | 89.92 (6.2)                     | <b>&lt;0.001</b> |
|                                 | pT3b | 178 (73.0%)   | 65.40 (3.9)                |                  | 68.53 (4.0)                         |                  | 55.51 (4.0)                     |                  |
| pM0                             | pT3a | 187 (44.5%)   | 98.19 (2.9)                | <b>&lt;0.001</b> | 111.20 (2.1)                        | <b>&lt;0.001</b> | 104.36 (2.9)                    | <b>&lt;0.001</b> |
|                                 | pT3b | 233 (55.5%)   | 75.08 (3.4)                |                  | 82.15 (3.4)                         |                  | 74.76 (3.7)                     |                  |
| pM1                             | pT3a | 11 (16.4%)    | 37.04 (7.6)                | <b>0.827</b>     | 37.04 (7.6)                         | <b>0.827</b>     | 29.67 (8.2)                     | <b>0.956</b>     |
|                                 | pT3b | 56 (83.6%)    | 48.74 (6.3)                |                  | 49.58 (6.4)                         |                  | 39.36 (6.3)                     |                  |

| Supplementary Table 5           |      | Overall n (%) | Mean overall survival (SE) [months] | p-value      | Mean disease specific survival (SE) [months] | p-value      | Mean disease free survival (SE) [months] | p-value          |
|---------------------------------|------|---------------|-------------------------------------|--------------|----------------------------------------------|--------------|------------------------------------------|------------------|
| All pT3 Tumors                  | pT3a | 153 (49.5%)   | 80.09 (3.2)                         | <b>0.002</b> | 80.61 (3.2)                                  | <b>0.001</b> | 87.09 (8.0)                              | <b>&lt;0.001</b> |
|                                 | pT3b | 156 (50.5%)   | 69.17 (3.5)                         |              | 69.67 (3.5)                                  |              | 55.08 (3.3)                              |                  |
| WHO grade: low-grade subcohort  | pT3a | 111 (50.9%)   | 81.05 (3.4)                         | <b>0.008</b> | 81.79 (3.4)                                  | <b>0.007</b> | 87.79 (8.3)                              | <b>&lt;0.001</b> |
|                                 | pT3b | 107 (49.1%)   | 71.06 (4.1)                         |              | 71.88 (4.1)                                  |              | 54.79 (4.0)                              |                  |
| WHO grade: high-grade subcohort | pT3a | 42 (46.2%)    | 68.12 (6.8)                         | <b>0.177</b> | 68.12 (6.8)                                  | <b>0.177</b> | 66.28 (6.8)                              | <b>0.045</b>     |
|                                 | pT3b | 49 (53.8%)    | 57.61 (4.0)                         |              | 57.61 (4.0)                                  |              | 51.31 (4.1)                              |                  |
| pN0 subcohort                   | pT3a | 99 (56.6%)    | 82.56 (3.5)                         | <b>0.096</b> | 83.40 (3.5)                                  | <b>0.089</b> | 79.84 (3.7)                              | <b>0.034</b>     |
|                                 | pT3b | 76 (43.4%)    | 74.20 (3.6)                         |              | 75.20 (3.5)                                  |              | 68.44 (3.9)                              |                  |
| pN1/2 subcohort                 | pT3a | 54 (40.3%)    | 73.82 (5.8)                         | <b>0.031</b> | 73.82 (5.8)                                  | <b>0.031</b> | 82.23 (10.0)                             | <b>&lt;0.001</b> |
|                                 | pT3b | 80 (59.7%)    | 58.24 (5.9)                         |              | 58.24 (5.9)                                  |              | 34.79 (2.6)                              |                  |
| pM0                             | pT3a | 146 (50.7%)   | 81.03 (3.2)                         | <b>0.002</b> | 81.59 (3.1)                                  | <b>0.001</b> | 89.31 (8.1)                              | <b>&lt;0.001</b> |
|                                 | pT3b | 142 (49.3%)   | 67.00 (3.4)                         |              | 67.50 (3.4)                                  |              | 56.62 (3.4)                              |                  |
| pM1                             | pT3a | 7 (33.3%)     | 24.86 (5.5)                         | <b>0.879</b> | 24.86 (5.5)                                  | <b>0.879</b> | 15.86 (4.5)                              | <b>0.388</b>     |
|                                 | pT3b | 14 (66.7%)    | 56.06 (12.1)                        |              | 56.06 (12.1)                                 |              | 33.11 (7.7)                              |                  |

| Supplementary Table 6           |      | Overall n (%) | Mean overall survival (SE) [months] | p-value          | Mean disease specific survival (SE) [months] | p-value          | Mean disease free survival (SE) [months] | p-value          |
|---------------------------------|------|---------------|-------------------------------------|------------------|----------------------------------------------|------------------|------------------------------------------|------------------|
| All pT3 Tumors                  | pT3a | 96 (40.0%)    | 57.45 (5.2)                         | <b>0.001</b>     | 81.27 (6.5)                                  | <b>&lt;0.001</b> | 77.94 (6.5)                              | <b>&lt;0.001</b> |
|                                 | pT3b | 144 (60.0%)   | 36.23 (3.0)                         |                  | 40.79 (3.4)                                  |                  | 37.90 (3.5)                              |                  |
| WHO grade: low-grade subcohort  | pT3a | 82 (42.1%)    | 58.95 (5.6)                         | <b>0.001</b>     | 81.40 (6.8)                                  | <b>&lt;0.001</b> | 78.41 (6.8)                              | <b>&lt;0.001</b> |
|                                 | pT3b | 113 (57.9%)   | 36.22 (3.4)                         |                  | 41.40 (4.0)                                  |                  | 38.00 (4.0)                              |                  |
| WHO grade: high-grade subcohort | pT3a | 14 (31.1%)    | 39.10 (4.6)                         | <b>0.255</b>     | 45.55 (3.8)                                  | <b>0.032</b>     | 42.63 (4.3)                              | <b>0.032</b>     |
|                                 | pT3b | 31 (68.9%)    | 34.65 (5.7)                         |                  | 39.13 (6.4)                                  |                  | 35.96 (6.6)                              |                  |
| pN0 subcohort                   | pT3a | 61 (48.8%)    | 53.65 (6.1)                         | <b>0.393</b>     | 81.68 (7.0)                                  | <b>0.008</b>     | 77.42 (7.0)                              | <b>0.034</b>     |
|                                 | pT3b | 64 (51.2%)    | 44.74 (4.7)                         |                  | 52.43 (5.6)                                  |                  | 53.0 (6.0)                               |                  |
| pN1/2 subcohort                 | pT3a | 35 (30.4%)    | 64.71 (9.2)                         | <b>&lt;0.001</b> | 74.09 (9.7)                                  | <b>&lt;0.001</b> | 70.33 (10.3)                             | <b>&lt;0.001</b> |
|                                 | pT3b | 80 (69.6%)    | 29.96 (3.5)                         |                  | 31.75 (3.7)                                  |                  | 26.04 (3.4)                              |                  |
| pM0                             | pT3a | 88 (44.9%)    | 61.35 (5.7)                         | <b>0.012</b>     | 90.31 (6.8)                                  | <b>&lt;0.001</b> | 86.56 (6.7)                              | <b>&lt;0.001</b> |
|                                 | pT3b | 108 (55.1%)   | 42.08 (3.7)                         |                  | 49.23 (4.4)                                  |                  | 49.18 (4.6)                              |                  |
| pM1                             | pT3a | 8 (18.2%)     | 28.38 (8.6)                         | <b>0.418</b>     | 28.38 (8.6)                                  | <b>0.418</b>     | 26.88 (8.4)                              | <b>0.175</b>     |
|                                 | pT3b | 36 (81.8%)    | 21.72 (3.3)                         |                  | 21.72 (3.3)                                  |                  | 16.56 (2.7)                              |                  |

| <b>Supplementary Table 7</b> | <b>HR (DSS)</b> | <b>lower CI (95%)</b> | <b>upper CI (95%)</b> | <b>p-value</b>   |
|------------------------------|-----------------|-----------------------|-----------------------|------------------|
| <b>revised pT3</b>           |                 |                       |                       | <b>&lt;0.001</b> |
| <i>pT3a</i>                  | 1.00            |                       |                       |                  |
| <i>pT3b</i>                  | 2.78            | 1.76                  | 4.40                  |                  |
| <b>Gender</b>                |                 |                       |                       | <b>0.119</b>     |
| <i>male</i>                  | 1.00            |                       |                       |                  |
| <i>female</i>                | 0.75            | 0.52                  | 1.10                  |                  |
| <b>WHO-grade</b>             |                 |                       |                       | <b>0.016</b>     |
| <i>Low grade</i>             | 1.00            |                       |                       |                  |
| <i>High grade</i>            | 1.54            | 1.10                  | 2.18                  |                  |
| <b>pN</b>                    |                 |                       |                       | <b>0.104</b>     |
| <i>N0</i>                    | 1.00            |                       |                       |                  |
| <i>N1</i>                    | 1.07            | 0.70                  | 1.64                  |                  |
| <i>N2</i>                    | 1.51            | 0.92                  | 2.48                  |                  |
| <b>pM</b>                    |                 |                       |                       | <b>&lt;0.001</b> |
| <i>M0</i>                    | 1.00            |                       |                       |                  |
| <i>M1</i>                    | 2.42            | 1.57                  | 3.71                  |                  |
| <b>Resection margin</b>      |                 |                       |                       | <b>0.137</b>     |
| <i>R0</i>                    | 1.00            |                       |                       |                  |
| <i>R1</i>                    | 1.30            | 0.58                  | 2.91                  |                  |
| <i>R2</i>                    | 1.78            | 0.83                  | 3.82                  |                  |
| <b>Age group</b>             |                 |                       |                       | <b>0.074</b>     |
| <i>Below median</i>          | 1.00            |                       |                       |                  |
| <i>Median and above</i>      | 1.38            | 0.97                  | 1.95                  |                  |



| Supplementary Table 8 |                         | HR (DSS) | lower CI (95%) | upper CI (95%) | p-value          |
|-----------------------|-------------------------|----------|----------------|----------------|------------------|
| revised pT3           | <i>pT3a</i>             | 1.00     |                |                | <b>0.017</b>     |
|                       | <i>pT3b</i>             | 2.28     | 1.16           | 4.48           |                  |
| Gender                | <i>male</i>             | 1.00     |                |                | <b>0.331</b>     |
|                       | <i>female</i>           | 0.73     | 0.39           | 1.37           |                  |
| WHO-grade             | <i>Low grade</i>        | 1.00     |                |                | <b>0.859</b>     |
|                       | <i>High grade</i>       | 0.95     | 0.51           | 1.76           |                  |
| pN                    | <i>N0</i>               | 1.00     |                |                | <b>&lt;0.001</b> |
|                       | <i>N1</i>               | 1.40     | 0.64           | 3.09           |                  |
|                       | <i>N2</i>               | 3.90     | 1.93           | 7.89           |                  |
| pM                    | <i>M0</i>               | 1.00     |                |                | <b>0.036</b>     |
|                       | <i>M1</i>               | 2.75     | 1.07           | 7.11           |                  |
| Resection margin      | <i>R0</i>               | 1.00     |                |                | <b>0.195</b>     |
|                       | <i>R1</i>               | 0.85     | 0.19           | 3.76           |                  |
|                       | <i>R2</i>               | 4.62     | 0.46           | 46.78          |                  |
| Age group             | <i>Below median</i>     | 1.00     |                |                | <b>0.001</b>     |
|                       | <i>Median and above</i> | 3.46     | 1.69           | 7.07           |                  |

| Supplementary Table 9   | HR (DSS) | lower CI (95%) | upper CI (95%) | p-value          |
|-------------------------|----------|----------------|----------------|------------------|
| <b>revised pT3</b>      |          |                |                | <b>&lt;0.001</b> |
| <i>T3a</i>              | 1.00     |                |                |                  |
| <i>T3b</i>              | 2.62     | 1.60           | 4.28           |                  |
| <b>Gender</b>           |          |                |                | <b>0.779</b>     |
| <i>female</i>           | 1.00     |                |                |                  |
| <i>male</i>             | 1.06     | 0.71           | 1.59           |                  |
| <b>WHO-grade</b>        |          |                |                | <b>0.786</b>     |
| <i>Low grade</i>        | 1.00     |                |                |                  |
| <i>High grade</i>       | 0.93     | 0.56           | 1.55           |                  |
| <b>pN</b>               |          |                |                | <b>0.151</b>     |
| <i>N1</i>               | 1.00     |                |                |                  |
| <i>N2</i>               | 1.13     | 0.66           | 1.94           |                  |
| <i>N3</i>               | 1.58     | 0.85           | 2.94           |                  |
| <b>pM</b>               |          |                |                | <b>0.002</b>     |
| <i>M0</i>               | 1.00     |                |                |                  |
| <i>M1</i>               | 2.73     | 1.44           | 5.20           |                  |
| <b>Resection margin</b> |          |                |                | <b>0.364</b>     |
| <i>R0</i>               | 1.00     |                |                |                  |
| <i>R1</i>               | 1.51     | 0.62           | 3.69           |                  |
| <i>R2</i>               | 1.20     | 0.53           | 2.71           |                  |
| <b>Age group</b>        |          |                |                | <b>0.002</b>     |
| <i>Below median</i>     | 1.00     |                |                |                  |
| <i>Median and above</i> | 1.93     | 1.27           | 2.91           |                  |

| Supplementary Table 10          |                                | Overall n (%) | Mean overall survival (SE) [months] | p-value          | Mean disease specific survival (SE) [months] | p-value          | Mean disease free survival (SE) [months] | p-value          |
|---------------------------------|--------------------------------|---------------|-------------------------------------|------------------|----------------------------------------------|------------------|------------------------------------------|------------------|
| revised pT classification       | pT1                            | 79 (8.3%)     | 97.68 (4.8)                         | <b>&lt;0.001</b> | 115.54 (2.9)                                 | <b>&lt;0.001</b> | 111.58 (3.7)                             | <b>&lt;0.001</b> |
|                                 | pT2                            | 187 (19.7%)   | 93.33 (3.2)                         |                  | 103.92 (2.8)                                 |                  | 99.92 (3.1)                              |                  |
|                                 | pT3a                           | 198 (20.9%)   | 94.73 (3.0)                         |                  | 106.70 (2.5)                                 |                  | 100.08 (3.1)                             |                  |
|                                 | pT3b                           | 289 (30.4%)   | 69.66 (3.0)                         |                  | 75.22 (3.1)                                  |                  | 67.39 (3.3)                              |                  |
|                                 | pT4a                           | 126 (13.3%)   | 61.58 (4.5)                         |                  | 63.72 (4.6)                                  |                  | 53.70 (4.8)                              |                  |
|                                 | pT4b                           | 71 (7.5%)     | 46.66 (5.8)                         |                  | 53.65 (6.4)                                  |                  | 53.93 (7.0)                              |                  |
|                                 | WHO grade: low-grade subcohort | pT1           | 66 (10.2%)                          |                  | 100.80 (5.1)                                 |                  | <b>&lt;0.001</b>                         |                  |
| pT2                             |                                | 148 (22.9%)   | 95.31 (3.6)                         | 105.23 (3.0)     | 99.90 (3.5)                                  |                  |                                          |                  |
| pT3a                            |                                | 142 (22.0%)   | 95.49 (3.5)                         | 108.19 (2.8)     | 101.32 (3.5)                                 |                  |                                          |                  |
| pT3b                            |                                | 185 (28.7%)   | 78.20 (3.7)                         | 83.99 (3.7)      | 75.59 (4.1)                                  |                  |                                          |                  |
| pT4a                            |                                | 68 (10.5%)    | 72.34 (6.2)                         | 74.43 (6.3)      | 63.46 (6.6)                                  |                  |                                          |                  |
| pT4b                            |                                | 36 (5.6%)     | 49.12 (7.9)                         | 57.30 (9.0)      | 63.28 (10.2)                                 |                  |                                          |                  |
| WHO grade: high-grade subcohort |                                | pT1           | 13 (4.3%)                           | 82.77 (13.1)     | <b>&lt;0.001</b>                             | 110.63 (8.9)     |                                          | <b>&lt;0.001</b> |
|                                 | pT2                            | 39 (12.8%)    | 86.50 (7.3)                         | 99.54 (6.4)      |                                              | 99.79 (6.9)      |                                          |                  |
|                                 | pT3a                           | 56 (18.4%)    | 92.60 (5.8)                         | 102.89 (5.0)     |                                              | 97.02 (6.1)      |                                          |                  |
|                                 | pT3b                           | 104 (34.1%)   | 54.46 (4.9)                         | 59.39 (5.2)      |                                              | 52.88 (5.3)      |                                          |                  |
|                                 | pT4a                           | 58 (19.0%)    | 48.61 (6.0)                         | 50.79 (6.3)      |                                              | 42.63 (6.5)      |                                          |                  |
|                                 | pT4b                           | 35 (11.5%)    | 43.70 (8.4)                         | 49.65 (9.2)      |                                              | 44.22 (9.4)      |                                          |                  |
|                                 | pN0 subcohort                  | pT1           | 73 (13.8%)                          | 97.16 (5.1)      |                                              | <b>&lt;0.001</b> | 115.18 (3.1)                             |                  |
| pT2                             |                                | 142 (26.8%)   | 96.76 (3.5)                         | 109.37 (2.6)     | 106.64 (3.0)                                 |                  |                                          |                  |
| pT3a                            |                                | 132 (25.0%)   | 97.79 (3.4)                         | 109.27 (2.7)     | 105.13 (3.3)                                 |                  |                                          |                  |
| pT3b                            |                                | 111 (21.0%)   | 76.07 (4.8)                         | 86.60 (4.9)      | 88.97 (5.0)                                  |                  |                                          |                  |
| pT4a                            |                                | 48 (9.1%)     | 75.03 (7.6)                         | 79.43 (7.7)      | 71.87 (8.0)                                  |                  |                                          |                  |
| pT4b                            |                                | 23 (4.3%)     | 62.07 (10.3)                        | 80.58 (11.6)     | 73.88 (12.4)                                 |                  |                                          |                  |
| pN1/2 subcohort                 |                                | pT1           | 6 (1.4%)                            | 101.61 (16.8)    | <b>&lt;0.001</b>                             |                  | 114.37 (4.6)                             | <b>&lt;0.001</b> |
|                                 | pT2                            | 45 (10.7%)    | 82.17 (7.6)                         | 86.03 (7.4)      |                                              | 78.07 (8.1)      |                                          |                  |
|                                 | pT3a                           | 66 (15.7%)    | 88.82 (5.8)                         | 101.47 (5.1)     |                                              | 89.92 (6.2)      |                                          |                  |
|                                 | pT3b                           | 178 (42.3%)   | 65.40 (3.9)                         | 68.53 (4.0)      |                                              | 55.51 (4.0)      |                                          |                  |
|                                 | pT4a                           | 78 (18.5%)    | 52.84 (5.3)                         | 53.66 (5.4)      |                                              | 42.85 (5.6)      |                                          |                  |
|                                 | pT4b                           | 48 (11.4%)    | 39.16 (6.6)                         | 42.05 (7.1)      |                                              | 44.89 (8.1)      |                                          |                  |
|                                 | pM0                            | pT1           | 79 (9.8%)                           | 97.68 (4.8)      |                                              | <b>&lt;0.001</b> | 115.54 (2.9)                             |                  |
| pT2                             |                                | 179 (22.1%)   | 95.18 (3.2)                         | 106.40 (2.6)     | 102.26 (3.1)                                 |                  |                                          |                  |
| pT3a                            |                                | 187 (23.1%)   | 98.19 (2.9)                         | 111.20 (2.1)     | 104.36 (2.9)                                 |                  |                                          |                  |
| pT3b                            |                                | 233 (28.8%)   | 75.08 (3.4)                         | 82.15 (3.4)      | 74.78 (3.7)                                  |                  |                                          |                  |
| pT4a                            |                                | 82 (10.1%)    | 78.05 (5.6)                         | 80.73 (5.6)      | 71.04 (6.1)                                  |                  |                                          |                  |
| pT4b                            |                                | 49 (6.1%)     | 58.75 (7.4)                         | 64.63 (7.9)      | 62.03 (8.3)                                  |                  |                                          |                  |
| pM1                             |                                | pT1           | 0 (0.0%)                            | -                | <b>0.029</b>                                 |                  | -                                        | <b>0.158</b>     |
|                                 | pT2                            | 8 (5.7%)      | 49.08 (15.0)                        | 49.08 (15.0)     |                                              | 47.28 (16.0)     |                                          |                  |
|                                 | pT3a                           | 11 (7.8%)     | 37.04 (7.6)                         | 37.04 (7.6)      |                                              | 29.67 (8.2)      |                                          |                  |
|                                 | pT3b                           | 56 (39.7%)    | 48.74 (6.3)                         | 49.58 (6.4)      |                                              | 39.36 (6.3)      |                                          |                  |
|                                 | pT4a                           | 44 (31.2%)    | 29.74 (3.7)                         | 30.34 (3.8)      |                                              | 20.75 (3.2)      |                                          |                  |
|                                 | pT4b                           | 22 (15.6%)    | 21.19 (5.2)                         | 26.94 (7.3)      |                                              | 28.85 (8.6)      |                                          |                  |

| Supplementary Table 11          |      | Overall n (%) | Mean overall survival (SE) [months] | p-value          | Mean disease specific survival (SE) [months] | p-value          | Mean disease free survival (SE) [months] | p-value          |
|---------------------------------|------|---------------|-------------------------------------|------------------|----------------------------------------------|------------------|------------------------------------------|------------------|
| revised pT classification       |      |               |                                     | <b>&lt;0.001</b> |                                              | <b>&lt;0.001</b> |                                          | <b>&lt;0.001</b> |
|                                 | pT1  | 52 (9.6%)     | 107.79 (9.1)                        |                  | 117.04 (6.9)                                 |                  | 107.45 (5.1)                             |                  |
|                                 | pT2  | 121 (22.3%)   | 90.02 (6.1)                         |                  | 95.91 (5.9)                                  |                  | 86.62 (6.8)                              |                  |
|                                 | pT3a | 153 (28.2%)   | 80.09 (3.2)                         |                  | 80.61 (3.2)                                  |                  | 87.09 (8.0)                              |                  |
|                                 | pT3b | 156 (28.8%)   | 69.17 (3.5)                         |                  | 69.67 (3.5)                                  |                  | 55.08 (3.3)                              |                  |
|                                 | pT4a | 43 (7.9%)     | 55.87 (7.6)                         |                  | 57.37 (7.7)                                  |                  | 47.91 (7.8)                              |                  |
|                                 | pT4b | 17 (3.1%)     | 34.88 (6.7)                         |                  | 37.65 (6.7)                                  |                  | 30.42 (7.0)                              |                  |
| WHO grade: low-grade subcohort  |      |               |                                     | <b>&lt;0.001</b> |                                              | <b>&lt;0.001</b> |                                          | <b>&lt;0.001</b> |
|                                 | pT1  | 44 (11.3%)    | 105.03 (9.1)                        |                  | 116.97 (3.0)                                 |                  | 114.03 (4.1)                             |                  |
|                                 | pT2  | 95 (24.5%)    | 87.22 (6.6)                         |                  | 94.21 (6.4)                                  |                  | 82.41 (7.4)                              |                  |
|                                 | pT3a | 111 (28.6%)   | 81.05 (3.4)                         |                  | 81.79 (3.4)                                  |                  | 87.79 (8.3)                              |                  |
|                                 | pT3b | 107 (27.6%)   | 71.06 (4.1)                         |                  | 71.88 (4.1)                                  |                  | 54.79 (4.0)                              |                  |
|                                 | pT4a | 22 (5.7%)     | 54.94 (8.5)                         |                  | 57.88 (8.6)                                  |                  | 47.02 (8.6)                              |                  |
|                                 | pT4b | 9 (2.3%)      | 32.00 (6.1)                         |                  | 35.87 (5.7)                                  |                  | 21.31 (5.1)                              |                  |
| WHO grade: high-grade subcohort |      |               |                                     | <b>&lt;0.001</b> |                                              | <b>&lt;0.001</b> |                                          | <b>&lt;0.001</b> |
|                                 | pT1  | 8 (5.2%)      | 89.46 (15.7)                        |                  | 89.46 (15.7)                                 |                  | 87.46 (16.87)                            |                  |
|                                 | pT2  | 26 (16.9%)    | 63.38 (3.1)                         |                  | 63.38 (3.1)                                  |                  | 63.24 (3.2)                              |                  |
|                                 | pT3a | 42 (27.3%)    | 68.12 (6.8)                         |                  | 68.12 (6.8)                                  |                  | 66.28 (6.8)                              |                  |
|                                 | pT3b | 49 (31.8%)    | 57.61 (4.0)                         |                  | 57.61 (4.0)                                  |                  | 51.31 (4.1)                              |                  |
|                                 | pT4a | 21 (13.6%)    | 48.17 (8.7)                         |                  | 48.17 (8.7)                                  |                  | 40.66 (9.9)                              |                  |
|                                 | pT4b | 8 (5.2%)      | 34.25 (8.5)                         |                  | 34.25 (8.5)                                  |                  | 35.05 (10.0)                             |                  |
| pN0 subcohort                   |      |               |                                     | <b>0.085</b>     |                                              | <b>0.009</b>     |                                          | <b>&lt;0.001</b> |
|                                 | pT1  | 44 (13.4%)    | 102.37 (9.2)                        |                  | 113.96 (4.2)                                 |                  | 111.30 (4.8)                             |                  |
|                                 | pT2  | 92 (28.0%)    | 93.55 (6.9)                         |                  | 104.29 (3.9)                                 |                  | 102.68 (4.2)                             |                  |
|                                 | pT3a | 99 (30.2%)    | 82.55 (3.5)                         |                  | 83.40 (3.5)                                  |                  | 79.84 (3.7)                              |                  |
|                                 | pT3b | 76 (23.2%)    | 74.20 (3.6)                         |                  | 75.20 (3.5)                                  |                  | 68.44 (3.9)                              |                  |
|                                 | pT4a | 11 (3.4%)     | 56.43 (5.6)                         |                  | 56.43 (5.6)                                  |                  | 45.32 (8.9)                              |                  |
|                                 | pT4b | 6 (1.8%)      | 51.67 (3.8)                         |                  | 51.67 (3.8)                                  |                  | 47.33 (8.6)                              |                  |
| pN1/2 subcohort                 |      |               |                                     | <b>&lt;0.001</b> |                                              | <b>&lt;0.001</b> |                                          | <b>&lt;0.001</b> |
|                                 | pT1  | 8 (3.7%)      | 98.43 (16.5)                        |                  | 98.43 (16.5)                                 |                  | 98.43 (16.5)                             |                  |
|                                 | pT2  | 29 (13.6%)    | 72.47 (7.2)                         |                  | 72.47 (7.2)                                  |                  | 57.81 (6.4)                              |                  |
|                                 | pT3a | 54 (25.2%)    | 73.82 (5.8)                         |                  | 73.82 (5.8)                                  |                  | 82.23 (10.0)                             |                  |
|                                 | pT3b | 80 (37.4%)    | 58.24 (5.9)                         |                  | 58.24 (5.9)                                  |                  | 34.79 (2.6)                              |                  |
|                                 | pT4a | 32 (15.0%)    | 50.61 (8.8)                         |                  | 52.64 (9.0)                                  |                  | 43.60 (8.68)                             |                  |
|                                 | pT4b | 11 (5.1%)     | 18.33 (6.0)                         |                  | 21.16 (6.4)                                  |                  | 18.53 (6.0)                              |                  |
| pM0                             |      |               |                                     | <b>0.002</b>     |                                              | <b>&lt;0.001</b> |                                          | <b>&lt;0.001</b> |
|                                 | pT1  | 51 (10.5%)    | 110.07 (9.0)                        |                  | 112.00 (4.2)                                 |                  | 109.73 (4.7)                             |                  |
|                                 | pT2  | 117 (24.1%)   | 89.30 (6.7)                         |                  | 95.39 (6.7)                                  |                  | 88.06 (6.9)                              |                  |
|                                 | pT3a | 146 (30.1%)   | 81.03 (3.2)                         |                  | 81.59 (3.1)                                  |                  | 89.31 (8.1)                              |                  |
|                                 | pT3b | 142 (29.3%)   | 67.00 (3.4)                         |                  | 67.50 (3.4)                                  |                  | 56.62 (3.4)                              |                  |
|                                 | pT4a | 24 (4.9%)     | 71.03 (9.7)                         |                  | 71.07 (9.7)                                  |                  | 69.79 (10.8)                             |                  |
|                                 | pT4b | 5 (1.0%)      | 37.00 (7.2)                         |                  | 45.00 (0.0)                                  |                  | 21.87 (6.9)                              |                  |
| pM1                             |      |               |                                     | <b>0.326</b>     |                                              | <b>0.372</b>     |                                          | <b>0.592</b>     |
|                                 | pT1  | 1 (1.8%)      | 23.00 (0.0)                         |                  | 23.00 (0.0)                                  |                  | 23.00 (0.0)                              |                  |
|                                 | pT2  | 4 (7.0%)      | 56.33 (15.2)                        |                  | 56.33 (15.24)                                |                  | 21.38 (3.7)                              |                  |
|                                 | pT3a | 7 (12.3%)     | 24.86 (5.5)                         |                  | 24.86 (5.5)                                  |                  | 15.86 (4.5)                              |                  |
|                                 | pT3b | 14 (24.6%)    | 56.06 (12.1)                        |                  | 56.06 (12.1)                                 |                  | 33.11 (7.7)                              |                  |
|                                 | pT4a | 19 (33.3%)    | 25.89 (5.2)                         |                  | 27.65 (5.6)                                  |                  | 17.28 (3.9)                              |                  |
|                                 | pT4b | 12 (21.1%)    | 30.70 (8.3)                         |                  | 29.22 (7.5)                                  |                  | 30.97 (8.3)                              |                  |

| Supplementary Table 12          |                                | Overall n (%) | Mean overall survival (SE) | p-value          | Mean disease specific survival (SE) | p-value          | Mean disease free survival (SE) | p-value          |
|---------------------------------|--------------------------------|---------------|----------------------------|------------------|-------------------------------------|------------------|---------------------------------|------------------|
|                                 |                                |               | [months]                   |                  | [months]                            |                  | [months]                        |                  |
| revised pT classification       | pT1                            | 10 (2.2%)     | 47.12 (13.7)               | <b>&lt;0.001</b> | 88.20 (11.4)                        | <b>&lt;0.001</b> | 88.20 (11.4)                    | <b>&lt;0.001</b> |
|                                 | pT2                            | 58 (13.0%)    | 56.89 (5.0)                |                  | 79.39 (5.0)                         |                  | 75.93 (5.3)                     |                  |
|                                 | pT3a                           | 96 (21.5%)    | 57.45 (5.2)                |                  | 81.27 (6.5)                         |                  | 77.94 (6.5)                     |                  |
|                                 | pT3b                           | 144 (32.2%)   | 36.23 (3.0)                |                  | 40.79 (3.4)                         |                  | 37.90 (3.5)                     |                  |
|                                 | pT4a                           | 74 (16.6%)    | 35.72 (4.5)                |                  | 38.25 (4.7)                         |                  | 33.42 (4.2)                     |                  |
|                                 | pT4b                           | 65 (14.5%)    | 24.46 (3.9)                |                  | 28.06 (4.6)                         |                  | 28.93 (4.5)                     |                  |
|                                 | WHO grade: low-grade subcohort | pT1           | 10 (3.0%)                  |                  | 47.12 (13.7)                        |                  | <b>&lt;0.001</b>                |                  |
| pT2                             |                                | 51 (15.1%)    | 57.58 (5.4)                | 75.85 (5.6)      | 73.94 (5.7)                         |                  |                                 |                  |
| pT3a                            |                                | 82 (24.3%)    | 58.95 (5.6)                | 81.40 (6.8)      | 78.41 (6.8)                         |                  |                                 |                  |
| pT3b                            |                                | 113 (33.5%)   | 36.22 (3.4)                | 41.40 (4.0)      | 38.00 (4.0)                         |                  |                                 |                  |
| pT4a                            |                                | 42 (12.5%)    | 34.10 (5.8)                | 35.08 (5.8)      | 32.86 (5.2)                         |                  |                                 |                  |
| pT4b                            |                                | 39 (11.6%)    | 28.75 (5.6)                | 32.20 (6.0)      | 33.46 (6.1)                         |                  |                                 |                  |
| WHO grade: high-grade subcohort |                                | pT1           | 0 (0.0%)                   | -                | <b>0.005</b>                        | -                |                                 | <b>&lt;0.001</b> |
|                                 | pT2                            | 7 (6.4%)      | 50.43 (9.9)                | 120.00 (0.0)     |                                     | 120.00 (0.0)     |                                 |                  |
|                                 | pT3a                           | 14 (12.7%)    | 39.10 (4.6)                | 45.55 (3.8)      |                                     | 42.63 (4.3)      |                                 |                  |
|                                 | pT3b                           | 31 (28.2%)    | 34.65 (5.7)                | 39.13 (6.4)      |                                     | 35.96 (6.6)      |                                 |                  |
|                                 | pT4a                           | 32 (29.1%)    | 37.06 (6.9)                | 41.61 (7.3)      |                                     | 34.24 (6.9)      |                                 |                  |
|                                 | pT4b                           | 26 (23.6%)    | 18.42 (4.8)                | 20.47 (5.4)      |                                     | 21.51 (5.4)      |                                 |                  |
|                                 | pN0 subcohort                  | pT1           | 8 (3.6%)                   | 30.41 (8.3)      |                                     | <b>0.024</b>     | 52.33 (6.3)                     |                  |
| pT2                             |                                | 49 (21.8%)    | 57.95 (5.5)                | 79.00 (5.4)      | 77.0 (5.6)                          |                  |                                 |                  |
| pT3a                            |                                | 61 (27.1%)    | 53.65 (6.1)                | 81.68 (7.0)      | 77.42 (7.0)                         |                  |                                 |                  |
| pT3b                            |                                | 64 (28.4%)    | 44.74 (4.7)                | 52.43 (5.6)      | 53.03 (6.0)                         |                  |                                 |                  |
| pT4a                            |                                | 27 (12.0%)    | 45.39 (8.3)                | 47.32 (8.1)      | 37.64 (7.7)                         |                  |                                 |                  |
| pT4b                            |                                | 16 (7.1%)     | 21.38 (7.6)                | 26.08 (8.6)      | 33.27 (8.8)                         |                  |                                 |                  |
| pN1/2 subcohort                 |                                | pT1           | 2 (0.9%)                   | 82.00 (19.0)     | <b>&lt;0.001</b>                    |                  | 101.00 (0.0)                    | <b>&lt;0.001</b> |
|                                 | pT2                            | 9 (4.1%)      | 48.75 (11.7)               | 54.33 (9.9)      |                                     | 54.33 (9.9)      |                                 |                  |
|                                 | pT3a                           | 35 (15.8%)    | 64.71 (9.2)                | 74.09 (9.7)      |                                     | 70.33 (10.3)     |                                 |                  |
|                                 | pT3b                           | 80 (36.0%)    | 29.96 (3.5)                | 31.75 (3.7)      |                                     | 26.04 (3.4)      |                                 |                  |
|                                 | pT4a                           | 47 (21.2%)    | 29.87 (4.9)                | 32.44 (5.2)      |                                     | 30.16 (4.7)      |                                 |                  |
|                                 | pT4b                           | 49 (22.1%)    | 25.23 (4.3)                | 27.92 (5.0)      |                                     | 27.48 (5.1)      |                                 |                  |
|                                 | pM0                            | pT1           | 10 (2.9%)                  | 47.12 (13.7)     |                                     | <b>&lt;0.001</b> | 88.20 (11.4)                    |                  |
| pT2                             |                                | 57 (16.8%)    | 56.76 (5.0)                | 79.25 (5.0)      | 77.24 (5.2)                         |                  |                                 |                  |
| pT3a                            |                                | 88 (25.9%)    | 61.35 (5.7)                | 90.31 (6.8)      | 86.56 (6.7)                         |                  |                                 |                  |
| pT3b                            |                                | 108 (31.8%)   | 42.08 (3.7)                | 49.23 (4.4)      | 49.18 (4.6)                         |                  |                                 |                  |
| pT4a                            |                                | 41 (12.1%)    | 46.15 (6.6)                | 47.40 (6.5)      | 40.55 (6.3)                         |                  |                                 |                  |
| pT4b                            |                                | 36 (10.6%)    | 27.17 (5.6)                | 34.34 (7.2)      | 35.31 (7.3)                         |                  |                                 |                  |
| pM1                             |                                | pT1           | 0 (0.0%)                   | -                | <b>0.923</b>                        |                  | -                               | <b>0.886</b>     |
|                                 | pT2                            | 1 (0.9%)      | 12.00 (0.0)                | 12.00 (0.0)      |                                     | 1.00 (0.00)      |                                 |                  |
|                                 | pT3a                           | 8 (7.5%)      | 28.38 (8.6)                | 28.38 (8.6)      |                                     | 26.88 (8.4)      |                                 |                  |
|                                 | pT3b                           | 36 (33.6%)    | 21.72 (3.3)                | 21.72 (3.3)      |                                     | 16.56 (2.7)      |                                 |                  |
|                                 | pT4a                           | 33 (30.8%)    | 24.34 (5.3)                | 27.70 (5.9)      |                                     | 25.80 (5.2)      |                                 |                  |
|                                 | pT4b                           | 29 (27.1%)    | 20.42 (4.9)                | 21.15 (5.1)      |                                     | 21.67 (4.7)      |                                 |                  |

| <b>Supplementary Table 13</b>    | <b>HR (DSS)</b> | <b>lower CI (95%)</b> | <b>upper CI (95%)</b> | <b>p-value</b>   |
|----------------------------------|-----------------|-----------------------|-----------------------|------------------|
| <b>revised pT classification</b> |                 |                       |                       | <b>&lt;0.001</b> |
| <i>pT1</i>                       | 1.00            |                       |                       |                  |
| <i>pT2</i>                       | 2.61            | 0.92                  | 7.45                  |                  |
| <i>pT3a</i>                      | 2.07            | 0.72                  | 5.87                  |                  |
| <i>pT3b</i>                      | 5.25            | 1.90                  | 14.50                 |                  |
| <i>pT4a</i>                      | 6.46            | 2.30                  | 18.15                 |                  |
| <i>pT4b</i>                      | 9.33            | 3.26                  | 26.69                 |                  |
| <b>Gender</b>                    |                 |                       |                       | <b>0.345</b>     |
| <i>male</i>                      | 1.00            |                       |                       |                  |
| <i>female</i>                    | 0.89            | 0.7                   | 1.14                  |                  |
| <b>WHO-grade</b>                 |                 |                       |                       | <b>0.058</b>     |
| <i>Low grade</i>                 | 1.00            |                       |                       |                  |
| <i>High grade</i>                | 1.28            | 0.99                  | 1.64                  |                  |
| <b>pN</b>                        |                 |                       |                       | <b>&lt;0.001</b> |
| <i>pN0</i>                       | 1.00            |                       |                       |                  |
| <i>pN1</i>                       | 1.33            | 0.98                  | 1.81                  |                  |
| <i>pN2</i>                       | 1.96            | 1.38                  | 2.78                  |                  |
| <b>pM</b>                        |                 |                       |                       | <b>&lt;0.001</b> |
| <i>pM0</i>                       | 1.00            |                       |                       |                  |
| <i>pM1</i>                       | 2.56            | 1.89                  | 3.46                  |                  |
| <b>Resection margin</b>          |                 |                       |                       | <b>0.019</b>     |
| R0                               | 1.00            |                       |                       |                  |
| R1                               | 1.56            | 1.02                  | 2.39                  |                  |
| R2                               | 1.74            | 1.09                  | 2.76                  |                  |
| <b>Age group</b>                 |                 |                       |                       | <b>0.001</b>     |
| <i>Below median</i>              | 1.00            |                       |                       |                  |
| <i>Median and above</i>          | 1.54            | 1.21                  | 1.96                  |                  |

| <b>Supplementary Table 14</b>    | <b>HR (DSS)</b> | <b>lower CI (95%)</b> | <b>upper CI (95%)</b> | <b>p-value</b>   |
|----------------------------------|-----------------|-----------------------|-----------------------|------------------|
| <b>revised pT classification</b> |                 |                       |                       | <b>0.008</b>     |
| <i>pT1</i>                       | 1.00            |                       |                       |                  |
| <i>pT2</i>                       | 1.28            | 0.40                  | 4.06                  |                  |
| <i>pT3a</i>                      | 1.12            | 0.36                  | 3.53                  |                  |
| <i>pT3b</i>                      | 2.29            | 0.77                  | 6.80                  |                  |
| <i>pT4a</i>                      | 2.56            | 0.80                  | 8.21                  |                  |
| <i>pT4b</i>                      | 6.76            | 1.63                  | 28.03                 |                  |
| <b>Gender</b>                    |                 |                       |                       | <b>0.586</b>     |
| <i>male</i>                      | 1.00            |                       |                       |                  |
| <i>female</i>                    | 0.89            | 0.57                  | 1.37                  |                  |
| <b>WHO-grade</b>                 |                 |                       |                       | <b>0.322</b>     |
| <i>Low grade</i>                 | 1.00            |                       |                       |                  |
| <i>High grade</i>                | 1.26            | 0.80                  | 1.97                  |                  |
| <b>pN</b>                        |                 |                       |                       | <b>&lt;0.001</b> |
| <i>pN0</i>                       | 1.00            |                       |                       |                  |
| <i>pN1</i>                       | 1.57            | 0.88                  | 2.78                  |                  |
| <i>pN2</i>                       | 4.71            | 2.70                  | 8.22                  |                  |
| <b>pM</b>                        |                 |                       |                       | <b>0.002</b>     |
| <i>pM0</i>                       | 1.00            |                       |                       |                  |
| <i>pM1</i>                       | 2.59            | 1.43                  | 4.68                  |                  |
| <b>Resection margin</b>          |                 |                       |                       | <b>0.636</b>     |
| R0                               | 1.00            |                       |                       |                  |
| R1                               | 0.97            | 0.41                  | 2.30                  |                  |
| R2                               | 1.64            | 0.21                  | 12.63                 |                  |
| <b>Age group</b>                 |                 |                       |                       | <b>&lt;0.001</b> |
| <i>Below median</i>              | 1.00            |                       |                       |                  |
| <i>Median and above</i>          | 2.28            | 1.44                  | 3.62                  |                  |

| Supplementary Table 15           | HR (DSS) | lower CI (95%) | upper CI (95%) | p-value          |
|----------------------------------|----------|----------------|----------------|------------------|
| <b>revised pT classification</b> |          |                |                | <b>&lt;0.001</b> |
| <i>pT1</i>                       | 1.00     |                |                |                  |
| <i>pT2</i>                       | 1.72     | 0.22           | 13.65          |                  |
| <i>pT3a</i>                      | 2.24     | 0.30           | 16.67          |                  |
| <i>pT3b</i>                      | 6.15     | 0.85           | 44.57          |                  |
| <i>pT4a</i>                      | 6.15     | 0.83           | 45.44          |                  |
| <i>pT4b</i>                      | 8.62     | 1.17           | 63.49          |                  |
| <b>Gender</b>                    |          |                |                | <b>0.500</b>     |
| <i>female</i>                    | 1.00     |                |                |                  |
| <i>male</i>                      | 0.91     | 0.68           | 1.20           |                  |
| <b>WHO-grade</b>                 |          |                |                | <b>0.857</b>     |
| <i>Low grade</i>                 | 1.00     |                |                |                  |
| <i>High grade</i>                | 1.03     | 0.75           | 1.43           |                  |
| <b>pN</b>                        |          |                |                | <b>0.195</b>     |
| <i>pN0</i>                       | 1.00     |                |                |                  |
| <i>pN1</i>                       | 1.19     | 0.82           | 1.72           |                  |
| <i>pN2</i>                       | 1.29     | 0.88           | 1.90           |                  |
| <b>pM</b>                        |          |                |                | <b>&lt;0.001</b> |
| <i>pM0</i>                       | 1.00     |                |                |                  |
| <i>pM1</i>                       | 1.95     | 1.34           | 2.85           |                  |
| <b>Resection margin</b>          |          |                |                | <b>0.226</b>     |
| R0                               | 1.00     |                |                |                  |
| R1                               | 1.22     | 0.72           | 2.06           |                  |
| R2                               | 1.35     | 0.83           | 2.17           |                  |
| <b>Age group</b>                 |          |                |                | <b>0.002</b>     |
| <i>Below median</i>              | 1.00     |                |                |                  |
| <i>Median and above</i>          | 1.59     | 1.19           | 2.12           |                  |



| <b>Supplementary Table 16</b>  |             |                                     |             |                        |                    |                  |
|--------------------------------|-------------|-------------------------------------|-------------|------------------------|--------------------|------------------|
|                                |             | <b>pT3 conventional measurement</b> |             | <b>Number of cases</b> | <b>Kappa-value</b> | <b>p-value</b>   |
|                                |             | <b>pT3a</b>                         | <b>pT3b</b> |                        |                    |                  |
| <b>pT3 digital measurement</b> | <b>pT3a</b> | 74                                  | 1           | 75                     | <b>0.89</b>        | <b>&lt;0.001</b> |
|                                | <b>pT3b</b> | 5                                   | 45          | 50                     |                    |                  |
| <b>Number of cases</b>         |             | 79                                  | 46          | 125                    |                    |                  |

## **Supplementary material legends**

**Supplementary Figure 1:** Disease specific survival analysis of pT3a vs. pT3b within all pT3 colon cancers (A) and in all pT3 rectal cancers (B), with a comparable survival impact in both anatomic subgroups, that is also visible in comparison to other pT stages, as separately shown for colon cancers (C) and rectal cancers (D).

**Supplementary Table 1:** Distribution and prognostic relevance of basic clinicopathological and morphological parameters in the training cohort (Munich).

**Supplementary Table 2:** Distribution and prognostic relevance of basic clinicopathological and morphological parameters in validation cohort 1 (Mainz).

**Supplementary Table 3:** Distribution and prognostic relevance of basic clinicopathological and morphological parameters in validation cohort 2 (Bayreuth).

**Supplementary Table 4:** Impact on survival parameters (log-rank test) of the proposed pT3a/b substratification in pT3 CRC subgroup of the training cohort (Munich), including pN, pM and WHO-grade subgroups.

**Supplementary Table 5:** Impact on survival parameters (log-rank test) of the proposed pT3a/b substratification in pT3 CRC subgroup of validation cohort 1 (Mainz), including pN, pM and WHO-grade subgroups.

**Supplementary Table 6:** Impact on survival parameters (log-rank test) of the proposed pT3a/b substratification in pT3 CRC subgroup of validation cohort 2 (Bayreuth), including pN, pM and WHO-grade subgroups.

**Supplementary Table 7:** Multivariate analysis for Disease specific survival (DSS) of the proposed pT3a/b substratification (Cox-regression) in the pT3 CRC subgroup of the training cohort (Munich) including age, gender, WHO-grade, pN, pM and resection margin.

**Supplementary Table 8:** Multivariate analysis for Disease specific survival (DSS) of the proposed pT3a/b substratification (Cox-regression) in the pT3 CRC subgroup of validation cohort 1 (Mainz), including age, gender, WHO-grade, pN, pM and resection margin.

**Supplementary Table 9:** Multivariate analysis for Disease specific survival (DSS) of the proposed pT3a/b substratification (Cox-regression) in the pT3 CRC subgroup of validation cohort 2 (Bayreuth), including age, gender, WHO-grade, pN, pM and resection margin.

**Supplementary Table 10:** Impact on survival parameters (log-rank test) in all CRCs of the revised pT classification including all pT-stages and the proposed pT3a/b substratification in the training cohort (Munich), including pN, pM and WHO-grade subgroups.

**Supplementary Table 11:** Impact on survival parameters (log-rank test) in all CRCs of the revised pT classification including all pT-stages and the proposed pT3a/b

substratification in validation cohort 1 (Mainz), including pN, pM and WHO-grade subgroups.

**Supplementary Table 12:** Impact on survival parameters (log-rank test) in all CRCs of the revised pT classification including all pT-stages and the proposed pT3a/b substratification in validation cohort 2 (Bayreuth), including pN, pM and WHO-grade subgroups.

**Supplementary Table 13:** Multivariate analysis for Disease specific survival (DSS) in all CRCs of the revised pT classification including all pT-stages and the proposed pT3a/b substratification of the training cohort (Munich) including age, gender, WHO-grade, pN, pM and resection margin.

**Supplementary Table 14:** Multivariate analysis for Disease specific survival (DSS) in all CRCs of the revised pT classification including all pT-stages and the proposed pT3a/b substratification of validation cohort 1 (Mainz), including age, gender, WHO-grade, pN, pM and resection margin.

**Supplementary Table 15:** Multivariate analysis for Disease specific survival (DSS) in all CRCs of the revised pT classification including all pT-stages and the proposed pT3a/b substratification of validation cohort 2 (Bayreuth), including age, gender, WHO-grade, pN, pM and resection margin.

**Supplementary Table 16:** Concordance of digital measurements versus non-digital measurements using a conventional light-microscope and a ruler.
